# Supplementary material
Source: Springer Nature journal article supplement (https://www.springermedizin.de/resource/supplementary/12882_2013_788_MOESM2_ESM.pdf/9454714)

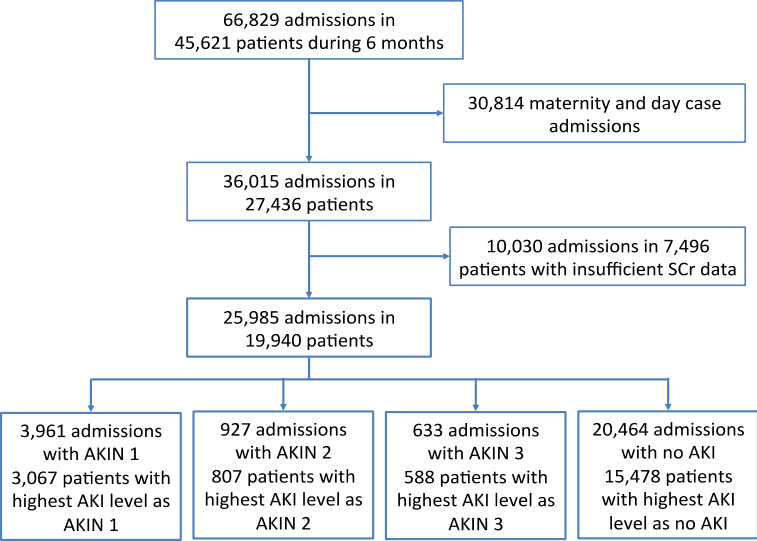

Supplement: MOESM2 [file 9454714]
